# Supplementary material for: Molecular mechanisms for the humic acid-enhanced formation of the ordered secondary structure of a conserved catalytic domain in phytase
Source: Royal Society of Chemistry journal article supplement (doi:10.1039/d2cp00054g), 2022-01-01
Supplement: d2cp00054g1.pdf [file d2cp00054g1.pdf]

1  
2  
3  
4  
5  
6  
7  
8  
9  
10  
11  
12  
13  
14  
15  
16  
17  
18  
19  
20  
21  
22

**Supporting Information (SI)**

**For**

**Molecular mechanisms of humic acid-enhanced formation of the  
ordered secondary structure of a conserved catalytic domain in  
phytase**

**Xinfei Ge,<sup>a</sup> Wenjun Zhang,<sup>\*a</sup> Christine V. Putnis,<sup>b,c</sup> and Lijun Wang,<sup>\*a</sup>**

<sup>a</sup>College of Resources and Environment, Huazhong Agricultural University, Wuhan  
430070, China

<sup>b</sup>Institut für Mineralogie, University of Münster, 48149 Münster, Germany

<sup>c</sup>School of Molecular and Life Science, Curtin University, Perth 6845, Australia

**Number of tables: 3**

**Number of figures: 9**

**Number of pages: 9**

23

24 **Table S1.** Assignments of Amide I and Amide III band positions for protein or25 peptide secondary structures with respective to IR and Raman spectra.<sup>1-4</sup>

| Structures      | Amide I (cm <sup>-1</sup> ) | Amide III (cm <sup>-1</sup> ) |
|-----------------|-----------------------------|-------------------------------|
| $\alpha$ -helix | 1648-1657                   | 1260-1310                     |
| Radom coil      | 1642-1660                   | 1230-1260                     |
| $\beta$ -sheet  | 1623-1641                   | 1220-1265                     |

26

27

28 **Table S2.**  $\Delta G_b$  and corresponding fitting parameters of -COOH, NH<sub>3</sub><sup>+</sup> and CH<sub>3</sub> from29 DFS data ( $x_t$ , distance to transition between bound and unbound states;  $f_{eq}$ ,30 equilibrium force). All values are represented as mean  $\pm$  standard deviation.

| Solutions          | Surfaces | Functional groups            | $k$ (N/m) | Fitting parameters |                    | $-\Delta G_b$ (KJ/mol) |
|--------------------|----------|------------------------------|-----------|--------------------|--------------------|------------------------|
|                    |          |                              |           | $x_t$ (Å)          | $f_{eq}$ (pN)      |                        |
| without<br>phytate | mica     | COOH                         | 0.1012    | 0.82 $\pm$ 0.066   | 230.53 $\pm$ 14.20 | 17.42 $\pm$ 1.98       |
|                    |          | NH <sub>3</sub> <sup>+</sup> | 0.1078    | 0.90 $\pm$ 0.052   | 165.19 $\pm$ 12.04 | 14.56 $\pm$ 1.65       |
|                    |          | CH <sub>3</sub>              | 0.0965    | 0.61 $\pm$ 0.042   | 82.68 $\pm$ 7.49   | 6.45 $\pm$ 0.83        |
|                    | HA       | COOH                         | 0.0921    | 0.90 $\pm$ 0.088   | 189.04 $\pm$ 12.46 | 16.17 $\pm$ 1.75       |
|                    |          | NH <sub>3</sub> <sup>+</sup> | 0.1105    | 0.91 $\pm$ 0.034   | 251.98 $\pm$ 15.89 | 21.76 $\pm$ 2.62       |
|                    |          | CH <sub>3</sub>              | 0.0791    | 0.64 $\pm$ 0.055   | 90.45 $\pm$ 7.84   | 6.55 $\pm$ 0.96        |
| with<br>phytate    | mica     | COOH                         | 0.0872    | 0.74 $\pm$ 0.048   | 239.20 $\pm$ 19.14 | 16.78 $\pm$ 1.76       |
|                    |          | NH <sub>3</sub> <sup>+</sup> | 0.0932    | 0.72 $\pm$ 0.052   | 157.61 $\pm$ 8.90  | 12.13 $\pm$ 1.53       |
|                    |          | CH <sub>3</sub>              | 0.0784    | 0.75 $\pm$ 0.053   | 84.12 $\pm$ 6.04   | 7.32 $\pm$ 0.78        |
|                    | HA       | COOH                         | 0.0694    | 0.73 $\pm$ 0.064   | 193.87 $\pm$ 13.19 | 14.45 $\pm$ 1.86       |
|                    |          | NH <sub>3</sub> <sup>+</sup> | 0.0943    | 0.85 $\pm$ 0.047   | 238.84 $\pm$ 16.24 | 19.10 $\pm$ 1.54       |
|                    |          | CH <sub>3</sub>              | 0.0847    | 0.62 $\pm$ 0.067   | 87.28 $\pm$ 7.94   | 6.93 $\pm$ 0.82        |

31

32 **Table S3.**  $\Delta G_b$  and corresponding fitting parameters of ACD, ACD-1 and ACD-233 from DFS data ( $x_t$ , distance to transition between bound and unbound states;  $f_{eq}$ ,

34 equilibrium force). All values are represented as mean  $\pm$  standard deviation.

| Solutions          | Surfaces | Active domains | $k$ (N/m) | Fitting parameters |                    | $-\Delta G_b$<br>(KJ/mol) |
|--------------------|----------|----------------|-----------|--------------------|--------------------|---------------------------|
|                    |          |                |           | $x_t$ (Å)          | $f_{eq}$ (pN)      |                           |
| without<br>phytate | mica     | ACD            | 0.0915    | 0.54 $\pm$ 0.044   | 95.52 $\pm$ 6.07   | 6.14 $\pm$ 0.55           |
|                    |          | ACD-1          | 0.0786    | 0.60 $\pm$ 0.045   | 86.17 $\pm$ 7.28   | 6.13 $\pm$ 0.88           |
|                    |          | ACD-2          | 0.0623    | 0.63 $\pm$ 0.032   | 90.14 $\pm$ 6.47   | 6.23 $\pm$ 0.67           |
|                    | HA       | ACD            | 0.0831    | 0.77 $\pm$ 0.086   | 203.59 $\pm$ 14.3  | 15.71 $\pm$ 1.2           |
|                    |          | ACD-1          | 0.0905    | 0.59 $\pm$ 0.038   | 91.49 $\pm$ 8.49   | 6.38 $\pm$ 0.51           |
|                    |          | ACD-2          | 0.0718    | 0.64 $\pm$ 0.057   | 204.78 $\pm$ 14.2  | 14.8 $\pm$ 1.57           |
| with<br>phytate    | mica     | ACD            | 0.0859    | 0.66 $\pm$ 0.047   | 167.31 $\pm$ 9.65  | 11.64 $\pm$ 0.63          |
|                    |          | ACD-1          | 0.0672    | 0.71 $\pm$ 0.052   | 87.04 $\pm$ 9.12   | 7.20 $\pm$ 0.60           |
|                    |          | ACD-2          | 0.0826    | 0.53 $\pm$ 0.062   | 87.54 $\pm$ 6.89   | 6.37 $\pm$ 0.72           |
|                    | HA       | ACD            | 0.0799    | 0.88 $\pm$ 0.054   | 231.26 $\pm$ 13.14 | 19.29 $\pm$ 1.94          |
|                    |          | ACD-1          | 0.1043    | 0.59 $\pm$ 0.057   | 94.74 $\pm$ 8.16   | 6.58 $\pm$ 0.96           |
|                    |          | ACD-2          | 0.0619    | 0.74 $\pm$ 0.057   | 96.45 $\pm$ 12.2   | 6.7 $\pm$ 0.88            |

35

36

37 **Full-length phytase (FLP):**

|    |            |                     |            |            |
|----|------------|---------------------|------------|------------|
| 38 | MSDMKSGNIS | <b>RHGVRAPPFL</b>   | SLLIPLTPQS | AFAQSEPELK |
| 39 | LESVVIVSMK | AILITKATQL          | MQDVTPDAWP | TWPVKLGWLT |
| 40 | PRGGELIAYL | GHYQRQRLVA          | DGLLTKKGCP | QPGQVAIID  |
| 41 | VDERTRKTGE | AFAAGLAPDC          | AISVHTQADT | SSPDPLFNPL |
| 42 | KTGVCQLDNA | NVTDAILSRA          | GGSIADFTGH | RQTAFRELER |
| 43 | VLNFPQSNLC | LNREKQDESC          | SLTQALPSEL | KVSADNVSLT |
| 44 | GAVSLASMLT | EIFLLQ <b>HD</b> QG | MPEPGGEGSP | IHTSGTPC   |

45 **Fig. S1.** Amino acid sequences of FLP (Origin: EC 3.1.3.26, *Escherichia coli*)

46 containing N-terminal (RHGVRAP, ACD-1) and C-terminal (HD) active domains.

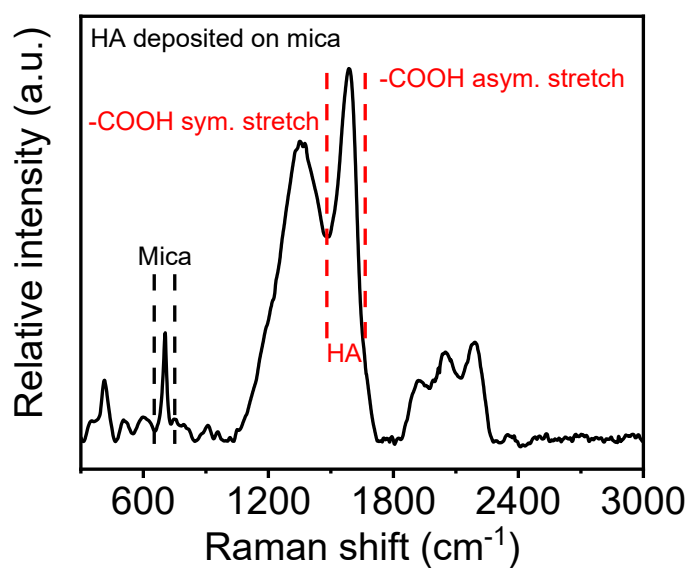

47

48 **Fig. S2.** Raman characteristic vibrations of mica and HA selected to conduct Raman  
 49 mapping.

50

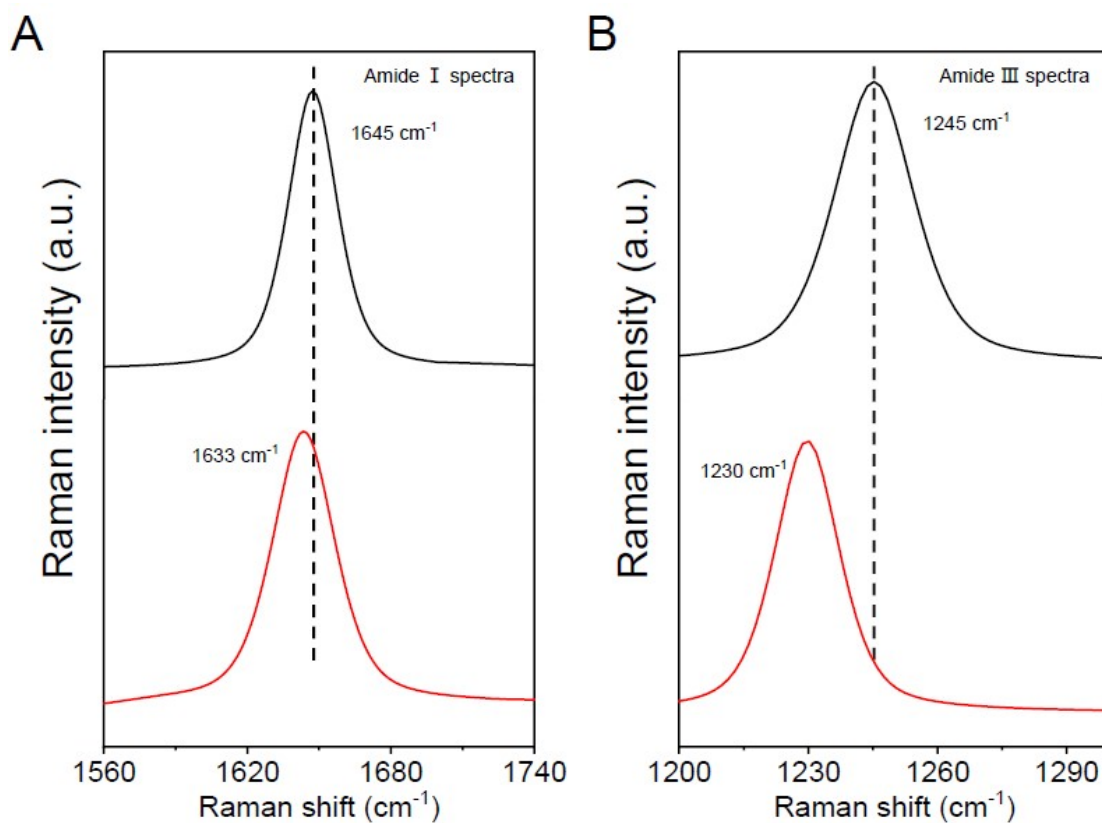

51

52 **Fig. S3.** Secondary structures of ACD in the region of (A) Amide I and (B) Amide III  
53 before (black lines) and after (red lines) treatment with HA.

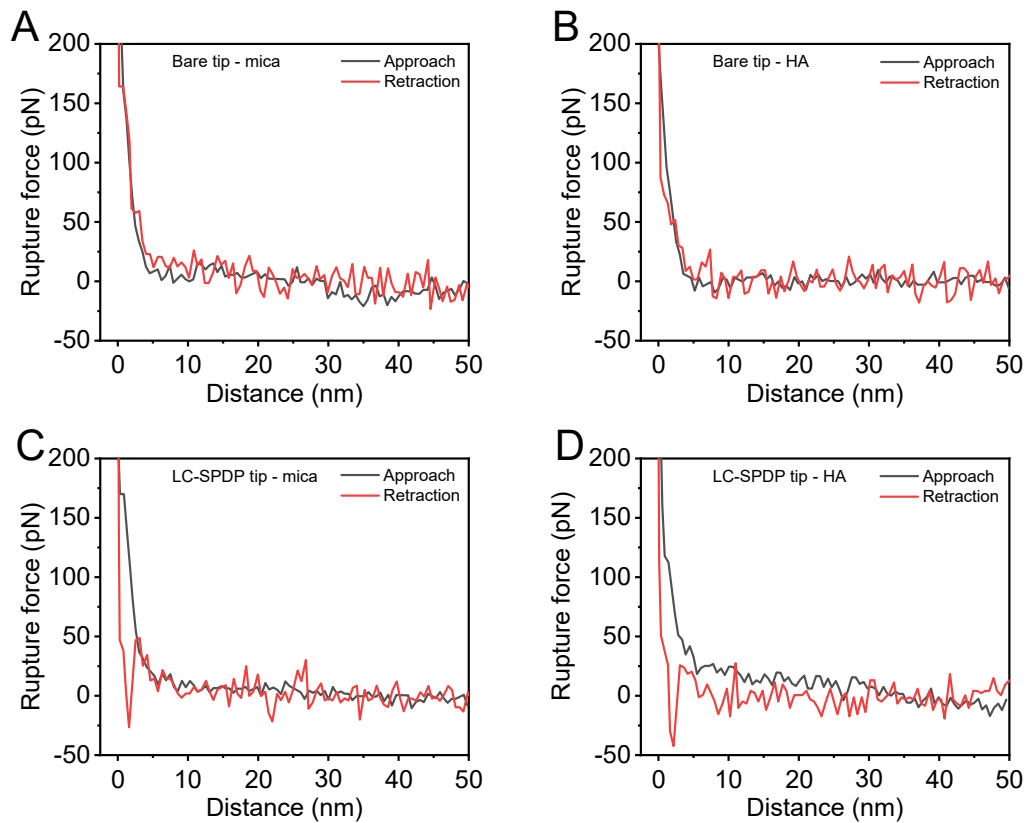

54

55 **Fig. S4.** Representative F-D curves between the Au-coated bare tip with (A) mica and  
56 (B) HA surface. Representative F-D curves between the LC-SPDP-functionalized tip  
57 with (C) mica and (D) HA surface. These typical F-D curves as key controls  
58 collectively excluded the interference from the interaction between Au-coated or LC-  
59 SPDP-functionalized tips and the two surfaces compared to functionalized tips of  
60 ACD(-1/2) as well as  $-\text{CH}_3-$ ,  $-\text{COOH}-$ ,  $-\text{NH}_3-$  terminal organic molecules.

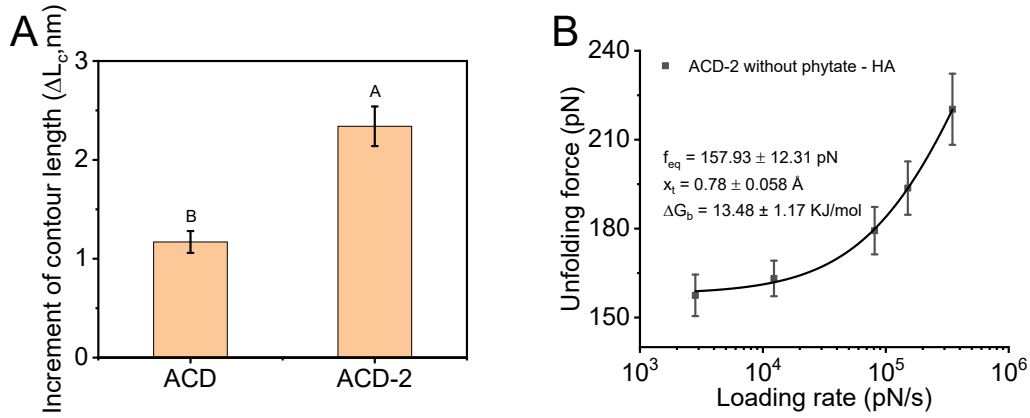

61

62 **Fig. S5.** (A) Analyses of  $\Delta L_c$  of ACD and ACD-2 separated from HA deposited on

63 mica surface. Different uppercase letters indicate significant difference at  $P < 0.01$ ,

64 which was analyzed by SPSS software. (B) A plot of mean unfolding force of the first

65 force-peak occurred in double-force curves versus loading rates, determining  $f_{eq}$  and

66  $\Delta G_b$  for allowing to break H-bonding as ACD-2 is retracted from HA. The derived  $f_{eq}$

67 and  $\Delta G_b$  are presented as mean  $\pm$  standard deviations ( $n = 3$ ).

68

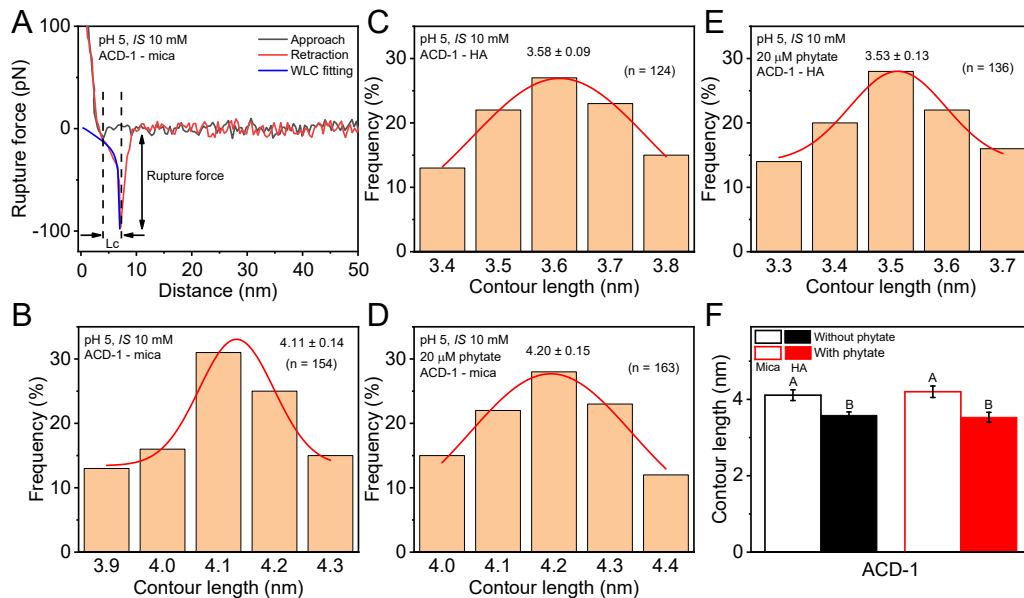

69

70 **Fig. S6.** (A) Representative F-D curve between ACD-1 and mica fitted by the WLC

71 model. The contour length ( $L_c$ ) obtained from F-D curves through WLC fitting during  
72 detaching ACD-1 from (B, D) mica and (C, E) mica with adsorbed HA in solutions  
73 (pH 5 and  $IS = 10$  mM NaCl) in the absence and presence of  $20 \mu\text{M}$  phytate. (F)  
74 Analysis of  $L_c$  of ACD-1 separated from mica or mica with adsorbed HA. Different  
75 uppercase letters indicate significant difference at  $P < 0.01$ , which was analyzed by  
76 SPSS software.

77

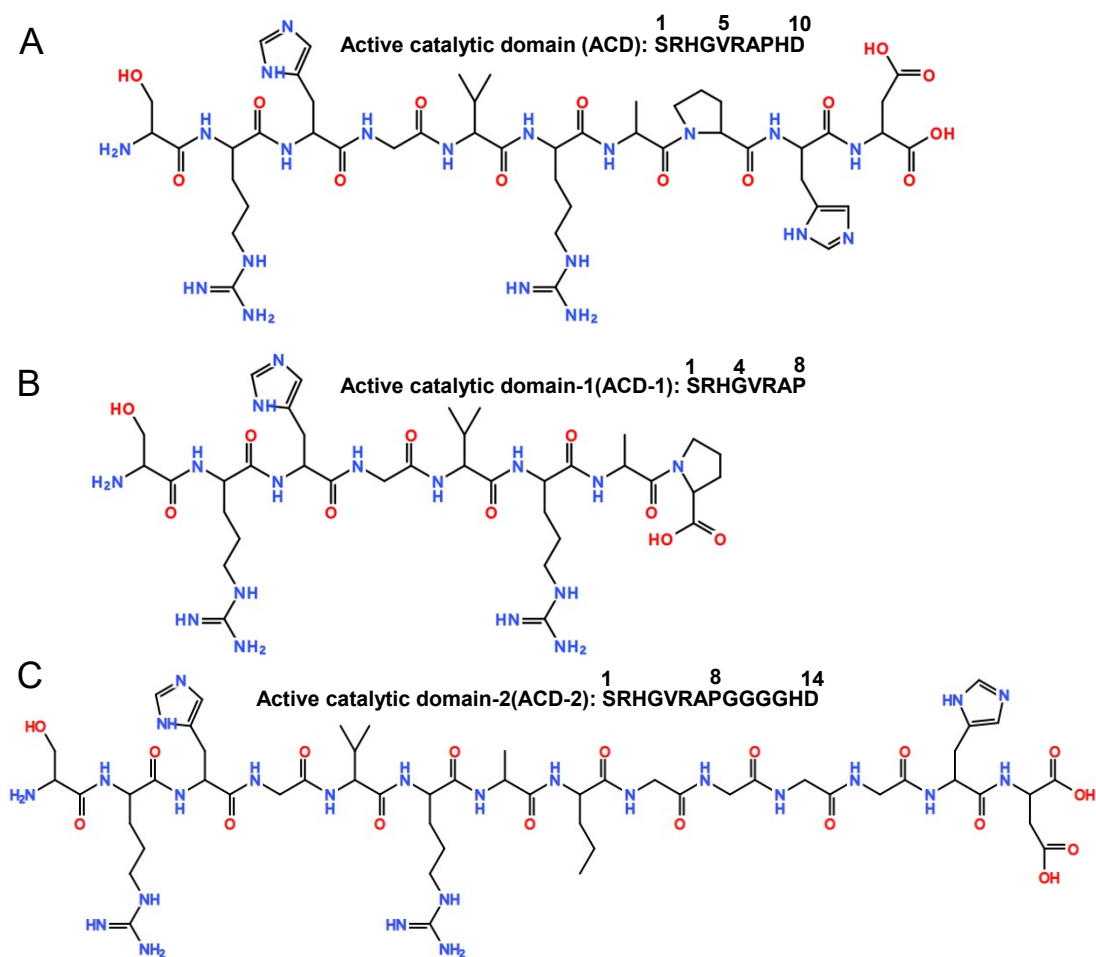

78

79 **Fig. S7.** Chemical structures of (A) ACD, (B) ACD-1 and (C) ACD-2 showing  
80 representative chemistries containing  $\text{CH}_3$ ,  $\text{NH}_3^+$  and  $\text{COOH}$ .

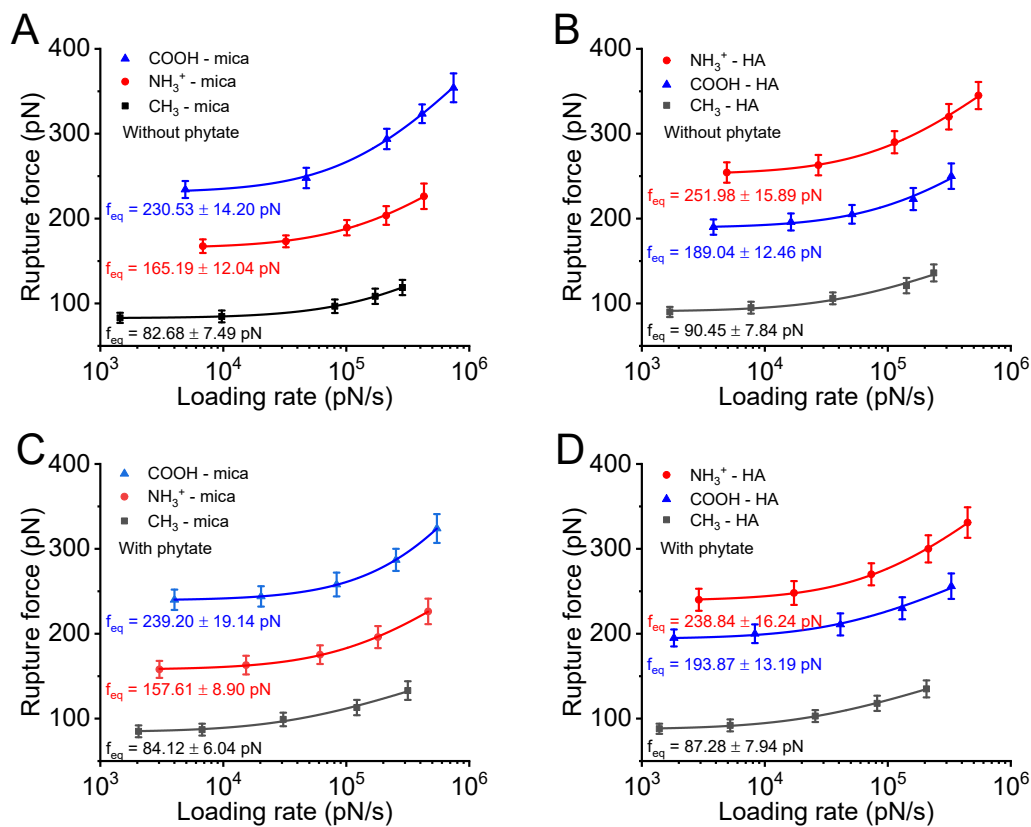

81

82 **Fig. S8.** Plots of mean rupture forces versus loading rates of COOH-, NH<sub>3</sub><sup>+</sup>- or CH<sub>3</sub>-

83 terminal model organic molecule at the mica/HA interface in the (A, B) absence and

84 (C, D) presence of 20 μM phytate in solutions (pH 5 and 1S 10 mM NaCl).

85

86

87



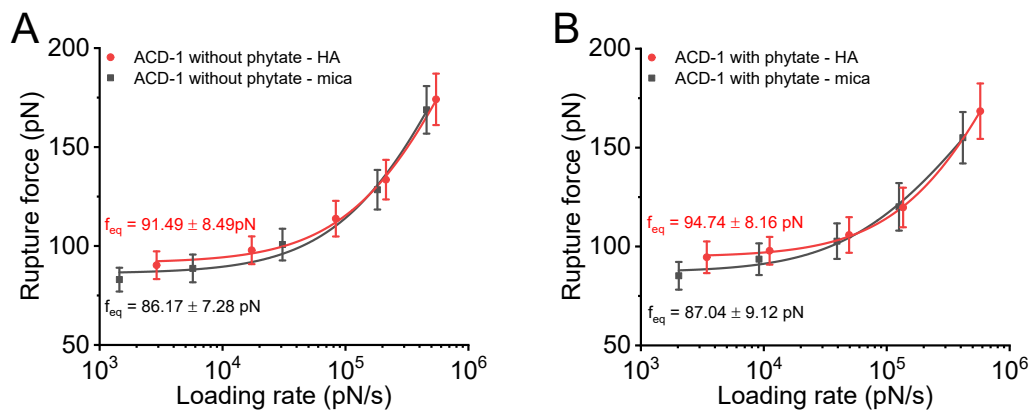

88

89 **Fig. S9.** Plots of mean rupture forces versus loading rates of ACD-1 at the mica/HA  
 90 interface in the (A) absence and (B) presence of 20  $\mu\text{M}$  phytate in solutions (pH 5 and  
 91  $I_S$  10 mM).

92 **SI References**

93 1 A. Barth and C. Zscherp, What Vibrations Tell Us about Proteins. *Quar. Rev.*  
 94 *Biophys.*, 2002, **35**, 369-430.

95 2 L. Tamm and S. A. Tatulian, Infrared spectroscopy of proteins and peptides in  
 96 lipid bilayers. *Quar. Rev. Biophys.*, 1997, **30**, 365-429.

97 3 G. Vedantham, H. G. Sparks, S. U. Sane, S. Tzannis and T. M. Przybycien, A  
 98 holistic approach for protein secondary structure estimation from infrared spectra  
 99 in  $\text{H}_2\text{O}$  solutions. *Anal. Biochem.*, 2000, **285**, 33-49.

100 4 E. A. Cooper and K. Knutson, Fourier transform infrared spectroscopy  
 101 investigations of protein structure. *Pharm. Biotechnol.*, 1995, **7**, 101-143.
